# Supplementary material for: Synthesis of transition metal doped lanthanum silicate oxyapatites by a facile co-precipitation method and their evaluation as solid oxide fuel cell electrolytes
Source: Royal Society of Chemistry journal article supplement (doi:10.1039/d2ra07088j), 2023-01-01
Supplement: d2ra07088j1.pdf [file d2ra07088j1.pdf]

Supplementary figure 1. FTIR absorption spectra of the  $\text{La}_{10}\text{Si}_6\text{-xCo}_x\text{O}_{27-\delta}$  apatites ( $x=0.0$ ,  $x=0.2$  and  $x=0.8$ ) samples calcined at 1000 °C.
